1 **Lactic Acid Production by *Clostridium acetobutylicum* and *Clostridium beijerinckii* Under**  
2 **Anaerobic Conditions Using a Complex Substrate**

3

4 <sup>1</sup>Mattiello-Franisco, L.; <sup>1</sup>Vieira, F. M.; <sup>1,2</sup>Peixoto, G.; <sup>1,\*</sup>Mockaitis, G.

5

6 <sup>1</sup>Interdisciplinary Research Group on Biotechnology Applied to the Agriculture and the  
7 Environment, School of Agricultural Engineering, University of Campinas  
8 (GBMA/FEAGRI/UNICAMP), 501 Cândido Rondon Avenue, CEP, 13.083-875, Campinas, SP,  
9 Brazil.

10 <sup>2</sup>Bioprocess and Biotechnology Department, Faculty of Pharmaceutical Sciences of Araraquara,  
11 Universidade Estadual Paulista “Júlio de Mesquita Filho” (FCFAR/UNESP), Araraquara-Jaú  
12 Road, Km 01 - Campus Universitário, CEP 14.801-902, Araraquara, SP, Brazil.

13 \*Corresponding Author: [gusmock@unicamp.br](mailto:gusmock@unicamp.br)

14

15 **SUMMARY/ ABSTRACT**

16 High societies consumption, elevated residues generation and environmental awareness  
17 strengthen alternatives solutions for bioprocess' residues. This study investigated the production  
18 of volatile acids from a complex substrate, which intends to be replaceable in the future by  
19 vinasse of sugar cane, in anaerobic reactors operated in triplicates at 35 °C. Two different  
20 inoculum were studied: *Clostridium acetobutylicum* ATCC 824 and *Clostridium beijerinckii*  
21 ATCC 25752. The nutrient medium had as carbon source a complex substrate containing sucrose  
22 without addition of vitamins, buffer solution and micronutrients. The experiment was conducted  
23 in the variation of F/M-ratio (food-to-microorganisms) by increasing substrate concentration.

24 The concentration of sucrose in the complex substrate were  $5.2 \text{ g}\cdot\text{L}^{-1}$  (conditions of  $10,000 \text{ mg}$   
25  $\text{O}_2\cdot\text{L}^{-1}$  in terms of COD) and  $10.5 \text{ g}\cdot\text{L}^{-1}$  (conditions of  $20,000 \text{ mg O}_2\cdot\text{L}^{-1}$  in terms of COD),  
26 keeping the initial concentration of inoculum in  $500 \text{ mg SVT}\cdot\text{L}^{-1}$ . Cultures *C. acetobutylicum* and  
27 *C. beijerinckii* resulted in high lactic acid production. Concentrations of COD of  $10,000 \text{ mg}$   
28  $\text{O}_2\cdot\text{L}^{-1}$  produced optimum lactic acid of  $3,331 \text{ mg}\cdot\text{L}^{-1}$  and  $5,709 \text{ mg}\cdot\text{L}^{-1}$  with respectively *C.*  
29 *acetobutylicum* and *C. beijerinckii*. Moreover, cultures *C. acetobutylicum* and *C. beijerinckii*  
30 with  $20,000 \text{ mg O}_2\cdot\text{L}^{-1}$  concentrations in terms of COD produced optimum lactic acid of  $6,417$   
31  $\text{mg}\cdot\text{L}^{-1}$  and  $7.136 \text{ mg}\cdot\text{L}^{-1}$  respectively. There was repeatability in the reactors when considering  
32 level of significance of 0.05, independent of the concentration and inoculum used.

33

#### 34 **KEYWORDS**

35 *Clostridium*; Lactic acid; F/M-ratio; Anaerobic processing

36

#### 37 **1 INTRODUCTION**

38 The replacement of fossil fuels by other sources of renewable energy grows worldwide, mainly  
39 because of the pressure of policies to preserve the environment. Processes that use biomass as  
40 raw material rather than non-renewable source are called biorefinery. An example of biorefinery  
41 in Brazil is sugar cane mills. The apparent antagonism between the environmental issue and the  
42 increased productivity can affect the economic viability of some industrial processes. Thus, an  
43 expanded concept of biorefinery aimed at a sustainable process is the use of all material flows  
44 present in a biological process. In sugarcane mills, the new concept of biorefinery as a  
45 sustainable process is established when using its residues, such as vinasse, for the generation of  
46 products with higher added value, such as acids and solvents.

47 Ethanol from sugarcane makes up a significant part of Brazil's bioenergy matrix. In the 2015, it  
48 was showed that 43.5% of the Brazilian energy matrix comes from renewable energy, 18.1% of  
49 which is sugarcane [1]. In the 2014/2015 crop, Brazil produced 634.8 million tons of sugarcane  
50 in 9 million hectares. Specifically, for ethanol production were 361 million tons of sugarcane,  
51 equivalent to 56.9% of total production [2]. The State of São Paulo has a strong influence in this  
52 sector, representing 49.4% of the country's ethanol production. In the 2016/2017 harvest, the  
53 State of São Paulo produced approximately 365.9 million tons of sugarcane [3]. Even though  
54 ethanol is an interesting alternative as biofuel, it continues to be a topic of improvements in the  
55 production process. At the Brazilian mills, on average, one ton of sugar cane produces 280 kg of  
56 bagasse [4] and 800 to 1,000 liters of vinasse [5]. Sugarcane vinasse is the liquid residue  
57 generated on a high scale in the ethanol production process. It is reported that, on average, in  
58 order to produce 1 liter of ethanol 10 – 15 liters of vinasse are generated which may vary  
59 depending of the material and technology used [6]. Since vinasse is a largely generated  
60 byproduct of ethanol production it is an example of a range of biomass which have been studied  
61 as an alternative substrate in anaerobic bioprocessing to produce added value products. It is  
62 constituted of organic solids and minerals, which may provide a rich culture medium for  
63 bioprocesses [7].

64 Due to the diversity of the composition during the harvests, some researchers choose to use a  
65 synthetic solution with characteristics similar to the biomass for conducting research. A synthetic  
66 effluent [8] with characteristics similar to the soluble fraction (1: 5) of sugarcane vinasse was  
67 used to evaluate the efficiency of COD and sulphate removal in the anaerobic fixed-bed and  
68 downflow (DFSBR) together with an acid solution rich in iron ore [8]. The substrate composition  
69 was defined based on the characterization of the real vinasse.

70 Anaerobic digestion is a process that occurs in the absence of oxygen and transforms various  
71 forms of complex organic matter (carbohydrates, proteins and lipids) into simpler products (such  
72 as carbon and methane) by the metabolism of a consortium of different microorganisms  
73 (SPEECE, 1996). Among the several metabolic routes present in the anaerobic process, the ABE  
74 (acetone, butanol and ethanol) fermentation was discovered in the 1920s by Chaim Weizmann.  
75 Effective anaerobic bacteria in the ABE fermentation process are those of the genus *Clostridium*,  
76 belonging to at least 60 species of bacteria of this genus. The anaerobic bacterium *C.*  
77 *acetobutylicum* produces naturally acetone, butanol and ethanol in a ratio of 3: 6: 1 from the pure  
78 glucose substrate [9]. It is emphasized that the metabolic sequence of *C. acetobutylicum* in the  
79 ABE fermentation has two phases: acidogenesis and solventogenesis [10]. In the acidogenic  
80 process cell growth occurs and the production of organic acids (acetic acid and butyric acid) with  
81 the consequent decrease of the pH of the medium to 4.5. Then, in the solventogenic process, the  
82 acids produced in the previous phase are in high concentrations allowing them to be processed in  
83 solvents. Although ethanol production is also part of the solventogenic process, it is considered  
84 that this route can occur independently of the production of acetone and butanol [11].  
85 Even though, the metabolic pathway of pyruvate to lactate shows as a deviation from ABE  
86 fermentation, lactate formation is a route of paramount importance and widely studied. The  
87 enzyme D-lactate dehydrogenase (LDH) is present in the reaction of pyruvate to lactate when  
88 using *C. acetobutylicum* ATCC 824. The enzyme D-Lactate dehydrogenase (LDH) has the  
89 cofactor fructose-1-6-diphosphate, and therefore is an enzyme with allosteric activation [13, 14].  
90 The anaerobic digestion of organic compounds to lactate instead of methane has some  
91 advantages due to the lower hydraulic retention time (HRT) which it is reported as less than 5  
92 days against 28 days in single stage reactors [14]. In addition, lactic acid has applications in

93 pharmaceutical and chemical industries, besides food and beverage sector, and it can be  
94 transformed in the biodegradable polymer poly(lactic acid) (PLA) [15].

95 This study is an experimental investigation aiming the production of acids and solvents from a  
96 complex substrate (with characteristics based on sugarcane vinasse) and the two different  
97 inoculums: *C. acetobutylicum* and *C. beijerinckii*.

98

## 99 **2 MATERIAL AND METHODS**

100

### 101 **2.1 Experimental procedure**

102 The experimental was done in batch reactors maintained under constant agitation in shakers (100  
103  $\text{min}^{-1}$ ) at 35°C during 720 hours. Those batch reactors were Duran® flasks (500 mL) with  
104 reactional volume of 250 mL and initial pH of 6.0. N<sub>2</sub>-gas was fluxioned 3 times of 8 min each  
105 to keep an anaerobic environment. The batch reactors were structured into two inoculums (*C.*  
106 *acetobutylicum* and *C. beijerinckii*) with substrate concentration of 10,000 and 20,000  $\text{mg O}_2\cdot\text{L}^{-1}$   
107 in terms of chemical oxygen demand (COD). The main parametron used was the ratio F/M-ratio,  
108 maintaining constantly the inoculum concentration of 500  $\text{mg SVT}\cdot\text{L}^{-1}$ . This ratio of inoculum  
109 was determined according to the variation of 2 to 4% used in an industrial scale [11]. Therefore,  
110 concentration of 10,000  $\text{mg O}_2\cdot\text{L}^{-1}$  in terms of COD refers to 5% and concentration of 20,000  $\text{mg}$   
111  $\text{O}_2\cdot\text{L}^{-1}$  in terms of COD refers to 2,5%. The experimental design of the research is detailed in  
112 Table 1.

113 Table 1 □ Experimental design of the influence of complex substrate concentration variation on  
114 each inoculum

| Organic matter<br>(mg O <sub>2</sub> ·L <sup>-1</sup> ) | F/M<br>(mg O <sub>2</sub> ·mg SVT <sup>-1</sup> ) | <i>C. acetobutylicum</i> | <i>C. beijerinckii</i> |
|---------------------------------------------------------|---------------------------------------------------|--------------------------|------------------------|
| 10,000                                                  | 20                                                | Ac-10                    | Bj-10                  |
| 20,000                                                  | 40                                                | Ac-20                    | Bj-20                  |

115

116 As shown in Table 1, the inoculums *C. acetobutylicum* and *C. beijerinckii* will be referred  
117 respectively to the abbreviation "Ac" and "Bj" in order to simplify the discussion of the results.

118 In each condition the reactor cycle started after inoculation and the end of the test occurred in  
119 720 hours. All assays of the experimental conditions previously described were conducted in  
120 triplicates.

121

## 122 **2.2 Composition of substrate**

123 The composition of the substrate used in this research was based on the macro and  
124 micronutrients employed by Godoi et al. (2017) [8].

125 The composition of substrate used in these experiments aims to approximate the complex  
126 substrate to the sugar cane vinasse. The study of the metabolism of a synthetic substrate rather  
127 than the actual substrate aims at the future application of this fundamental study in the biological  
128 processing of this residue. In this sense, it is important that the substrate used in this investigation  
129 is not a variable source of concentration and composition, which would impair the conclusions  
130 obtained. Table 2 shows the average concentrations of sucrose (carbon source) with their  
131 respective standard deviation used in the tests of 10,000 mg O<sub>2</sub>·L<sup>-1</sup> and 20,000 mg O<sub>2</sub>·L<sup>-1</sup> in  
132 terms of COD.

133 Table 2 □ Concentration of sucrose ( $\text{mg}\cdot\text{L}^{-1}$ ) in conditions of 10,000  $\text{mg O}_2\cdot\text{L}^{-1}$  and 20,000  $\text{mg}$   
134  $\text{O}_2\cdot\text{L}^{-1}$  in terms of COD with *C. acetobutylicum* and *C. beijerinckii*.

|       | <i>C. Acetobutylicum</i>                  |       | <i>C. Beijerinckii</i>                    |
|-------|-------------------------------------------|-------|-------------------------------------------|
|       | Sucrose ( $\text{mg}\cdot\text{L}^{-1}$ ) |       | Sucrose ( $\text{mg}\cdot\text{L}^{-1}$ ) |
| Ac-10 | $5,258.2 \pm 0.28$                        | Bj-10 | $5,256.8 \pm 1.70$                        |
| Ac-20 | $10,512.2 \pm 1.98$                       | Bj-20 | $10,515.8 \pm 0.28$                       |

135

136 It can be seen from the standard deviation shown in Table 2 that the triplicates had little variation  
137 in relation to the sucrose concentration, which allows comparisons of results in terms of  
138 metabolites production.

139

### 140 **2.3 Inoculum**

141 The pure cultures of *C. acetobutylicum* ATCC 824 and *C. beijerinckii* ATCC 25752 were  
142 obtained through a microorganism collection of the André Tosello Foundation - Campinas, SP.  
143 Both strains were stored in ampoules in lyophilized form. The strains were reactivated and the  
144 contents of the ampoules were transferred to a test tube containing 5 ml of liquid culture medium  
145 (RCM - Reinforced Clostridium Medium). Multiplication of each culture was performed in a 2L  
146 Erlenmeyer flask with 1L RCM medium kept in an oven at 35 ° C for at least 7 days until the  
147 turbidity of the medium stabilized. Monitoring of the growth curve of the cultures was performed  
148 by analysis of turbidity ( $\lambda = 500 \text{ nm}$ ) and total volatile solids.

149

## 150 **2.4 Monitoring analysis**

151 The pH and organic matter concentration determined according to Standard Methods [16]. The  
152 following variables were also monitored: carbohydrates [17], organic acids (Penteado et al.,  
153 2012) and alcohols (Penteado et al., 2012 and Pavini, 2017).

154 The liquid phase composition analyzes were determined by a modular Shimadzu® liquid  
155 chromatograph (HPLC), using an LC-10AD pump system, a CTO-20A column oven, a SCL-  
156 10A controller, a luminous matrix detector (PDA - Photo Diode Array), adjusted for scanning  
157 comprising a wavelength range of 190 to 370 nm (UV region), with 1 nm step, the  
158 chromatogram being read at 210 nm and a RID-10A refractometer detector with cell temperature  
159 of 35°C. The fixed phase comprised a BIO-RAD Aminex® HPX-87H 3000 x 7.8 mm column,  
160 with pre-column of the same type, operating at a constant temperature of 43°C. The eluent used  
161 was a 0.005 mol·L<sup>-1</sup> H<sub>2</sub>SO<sub>4</sub> solution at the flow rate of 0.5 ml·min<sup>-1</sup> and the volume injected  
162 was 100 µL. The integration and identification of peaks was performed using Shimadzu Class-  
163 VP® software version 5.032.

164 Analysis for butanol determination were carried out in the CEMPEQC laboratory using Thermo  
165 Electron Corporation (Thermo Scientific) model Trace GC Ultra, coupled with a TriPlus AS  
166 (Thermo Scientific) automatic sampling system and SGE Analytical Science liquid syringe with  
167 10 µL capacity. The column used was ZB-WAX (30 m x 0.25 mm x 0.25 µm, Phenomenex),  
168 with split/splitless injector, flame ionization detector (FID) and helium drag gas (He). The  
169 extraction of the analytics from the aqueous sample was performed according to the Pavini  
170 method (2017) by adding 0.555 g of sodium sulfate in 2.0 ml Eppendorf with two fractions of  
171 600 µL of sample and 400 µL of solution of 1-octanol containing Internal Standard at the  
172 concentration of 1,000 mg·L<sup>-1</sup>. After homogenization of the Eppendorf content for 30 seconds on



173 vortex tubes, 900  $\mu\text{L}$  of the supernatant (organic fraction) was removed for analysis on the gas  
174 chromatograph.

175

## 176 **2.5 Kinetic analysis**

177 The residual first order kinetic model from the simplification of the kinetic model proposed by  
178 Monod was used due to the low substrate concentrations. Equation 1 shows the model used to  
179 evaluate this study [18].

180

$$C(t) = C_R + (C_I - C_R) \cdot e^{-k_1^{\text{app}} \cdot t} \quad \text{I}$$

181

182 Where  $C(t)$  is the concentration of sucrose ( $\text{mg}\cdot\text{L}^{-1}$ );  $C_R$  is residual sucrose concentration ( $\text{mg}\cdot\text{L}^{-1}$ );  
183  $C_I$  is the initial concentration of sucrose ( $\text{mg}\cdot\text{L}^{-1}$ );  $t$  is the time of the experiment (hours) and  
184  $k_1^{\text{app}}$  is the apparent kinetic constant ( $\text{h}^{-1}$ ).

185 For the calculation of the lactic acid production it was used the simple dose-response sigmoid  
186 model, presented in Equation 2.

187

$$A(t) = \frac{A_{\text{max}}}{1 + 10^{(1-t) \cdot p}} \quad \text{2}$$

188

189 In Eq. 2,  $A(t)$  is the accumulated production of the product after a certain time  $t$  of fermentation  
190 ( $\text{mg}\cdot\text{L}^{-1}$ );  $A_{\text{max}}$  is the maximum production of the product ( $\text{mg}\cdot\text{L}^{-1}$ );  $1$  is the time to reach the  
191 maximum production speed (h);  $t$  is the time of the experiment (h) and  $p$  is the average rate of  
192 production of the product in the exponential growth phase ( $\text{mg} \cdot \text{L}^{-1} \cdot \text{h}^{-1}$ ).

193 The Levenberg-Marquadt interaction algorithm of Microcal Origin® v 8.1 software was used as  
194 an adjustment tool for kinetic parameters.

195

### 196 **3 RESULTS AND DISCUSSION**

197 Acids and solvents production from a complex substrate are influenced by reactors  
198 environmental. The fermentation process is dependent on a variety of conditions such as nutrient  
199 shortage and pH, the metabolism is highly influenced by these parameters and the fermentation  
200 can be favored in order to produce acids or solvents [19].

201 The parameters used to evaluate this study were consumption of sucrose and pH profile  
202 throughout the experiment.

#### 203 **Substrate consumption profiles**

204 Both inoculums were able to adapt to the complex substrate as well as to the concentrations  
205 evaluated. This behavior can be confirmed by the reduction of the organic matter concentration,  
206 expressed in terms of COD, observed in Figure 1. The adjustment of the first order residual  
207 kinetic model for sucrose concentration has been referenced by the line.

208 Figure 1 – Sucrose concentration profiles with *C. acetobutylicum* and *C. beijerinckii* inoculums  
209 at concentrations of 10,000 mg O<sub>2</sub>·L<sup>-1</sup> and 20,000 mg O<sub>2</sub>·L<sup>-1</sup>.

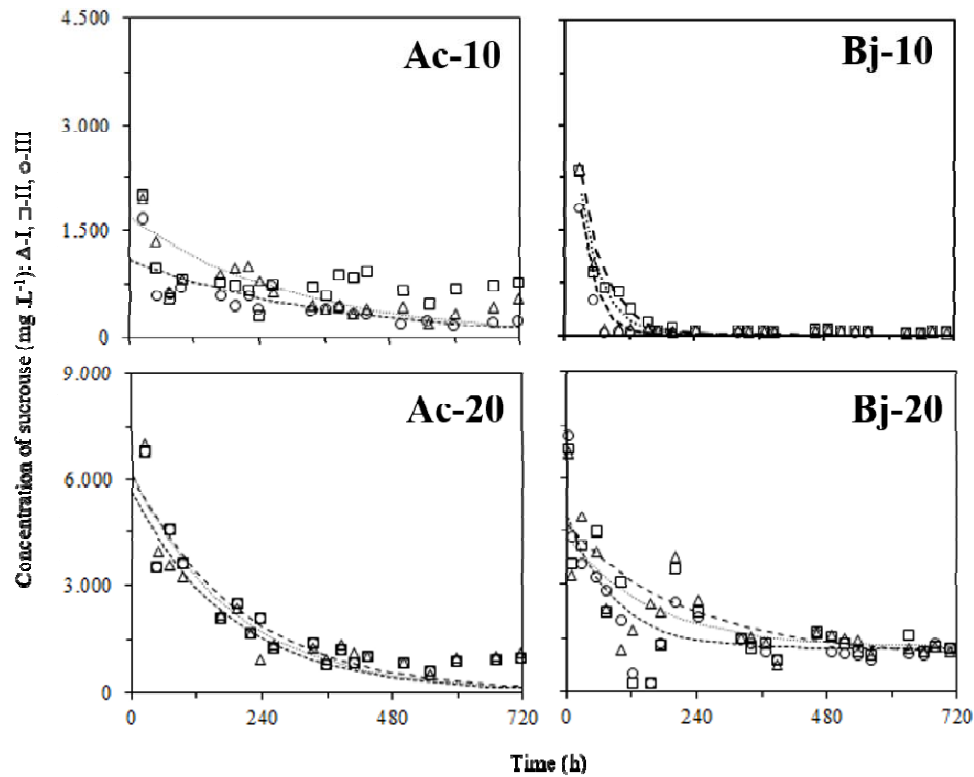

210  
211 The first sucrose concentration analysis occurred after 24 hours from experiment start. All the  
212 sucrose concentration adjustments presented satisfactory statistical correlation values ( $R_2 > 0.62$ ),  
213 mainly using *C. beijerinckii* ( $R_2 > 0.85$ ), indicating that the first-order kinetic model was adequate  
214 to represent the behavior of the substrate consumption for the both COD concentrations. The  
215 value variation of the first order apparent kinetic constants ( $k_1^{app}$ ) are presented in Table 2 and  
216 demonstrated that the increase of the initial complex substrate concentration exerted a favorable  
217 effect to the process. Therefore, lower values of the first order apparent kinetic constant ( $k_1^{app}$ )  
218 were obtained in the replicates of Bj-20 in relation to Bj-10.  
219  
220

221

| Strain                   | COD<br>(mg L <sup>-1</sup> ) | k <sub>1</sub> <sup>app</sup><br>(h <sup>-1</sup> ) |
|--------------------------|------------------------------|-----------------------------------------------------|
| <i>C. acetobutylicum</i> | 10,000                       |                                                     |
|                          | 20,000                       |                                                     |
| <i>C. beijerinckii</i>   | 10,000                       |                                                     |
|                          | 20,000                       |                                                     |

222

### 223 pH profiles

224 The pH profiles were performed at COD concentration of 10,000 mg O<sub>2</sub>·L<sup>-1</sup> and 20,000 mg O<sub>2</sub>·L<sup>-1</sup>  
225 <sup>1</sup> with *C. acetobutylicum* inoculum (conditions Ac-10 and Ac-20) and *C. beijerinckii* (Bj-10  
226 conditions and Bj-20). Each graph on the Figure 2 presents three pH curves for each triplicate  
227 (replicate I-Δ, replicate II - □ and replicate III - ○).

228 Figure 2 – pH profiles in the assays with *C. acetobutylicum* and *C. beijerinckii* inoculums at  
229 concentrations of 10,000 mg O<sub>2</sub>·L<sup>-1</sup> and 20,000 mg O<sub>2</sub>·L<sup>-1</sup>.

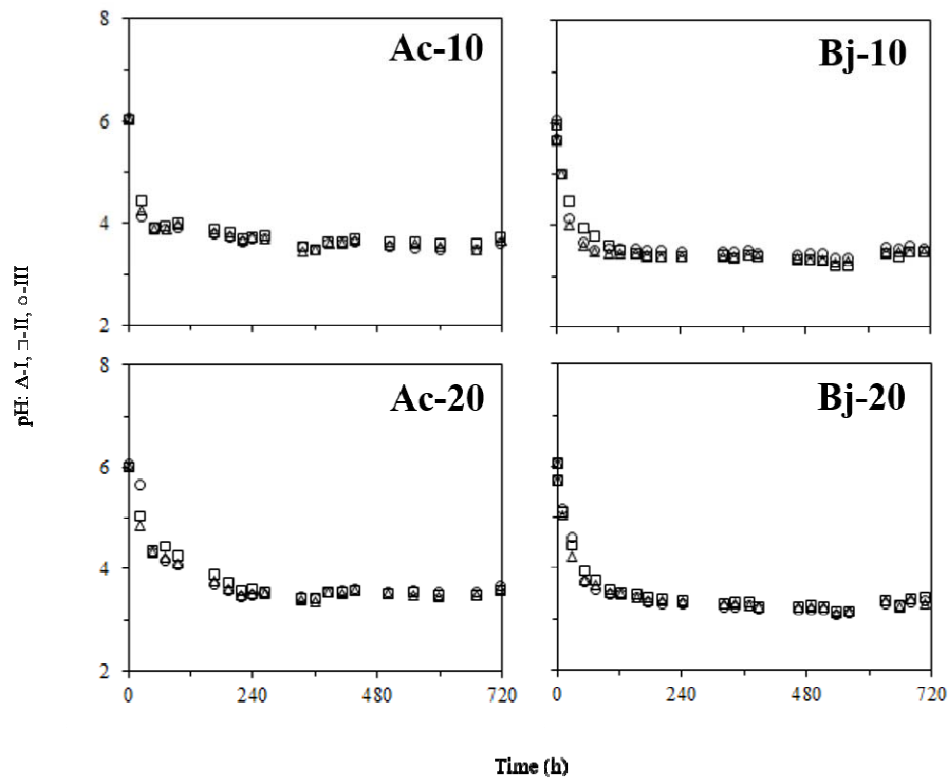

230

231 It can be observed that the pH declines throughout the experiment, suffering a variation from 6.0,  
232 which was set at all batches, to 3.5. Fig. 2 and 3 highlight that the lactic acid production occurred  
233 mostly when the pH was declined. The fermentation products were strongly affected by the pH.  
234 These observations agree with literature which has already reported that the metabolism of  
235 *Clostridium* strains shifts when the pH declines. It was observed that when pH decreased to  
236 below 6.0, acetic acid and lactic acid concentration increased, and the acidogenic pathway was  
237 favored. When the pH was reduced to below 5.0, lactic acid was the major fermentation product  
238 [20].

239

240

## 241 Metabolites production

242 The metabolites production was detected and monitored throughout the experiment. Figure 3  
243 shows the production of acetic acid (○), lactic acid (×) and ethanol (◆) occurred in one replicate  
244 for each condition.

245 Figure 3 – Products from reactors with *C. acetobutylicum* and *C. beijerinckii* inoculums at  
246 concentrations of 10,000 mg O<sub>2</sub>·L<sup>-1</sup> and 20,000 mg O<sub>2</sub>·L<sup>-1</sup>

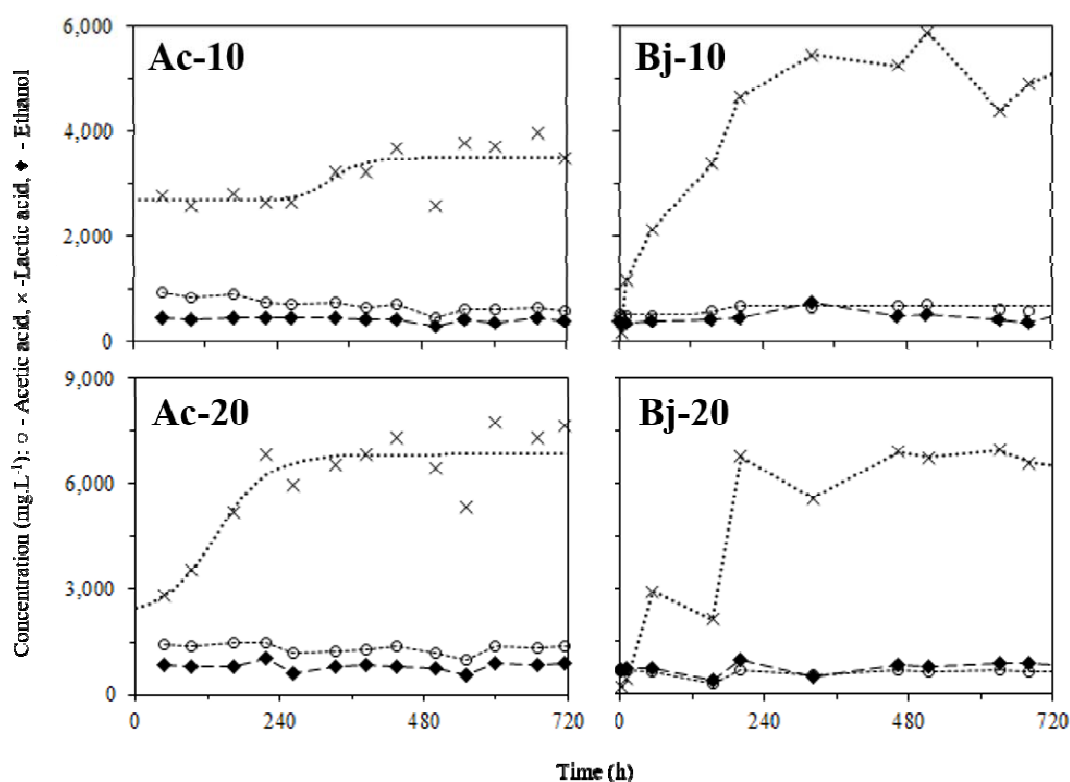

247

248 It is observed in Figure 3 that the concentration of ethanol and acetic acid remained stable during  
249 the experiment, while lactic acid production was favored. This behavior of the batches can occur  
250 due to the decrease of the pH, as already discussed. The carbon source concentration also plays a

251 major role in the experiment performance and can be observed in Fig. 3, since the conditions  
252 with higher COD presented higher lactic acid production.

253 According to Figure 3, a simple sigmoidal curve was performed for lactic acid production using  
254 *C. acetobutylicum*. Kinetic parameters for those curves are presented in Table 3. The best  
255 adjustment occurred with *C. acetobutylicum* at concentrations of COD of 20,000 mg O<sub>2</sub>·L<sup>-1</sup>.

256 Table 3 – Kinetic parameters ( $A_{max}$ ,  $A_{min}$ ,  $l$  e  $p$ ) and correlation coefficient ( $R^2$ ) related to lactic  
257 acid from reactors with *C. acetobutylicum* at concentrations of 10,000 mg O<sub>2</sub>·L<sup>-1</sup> and 20,000 mg  
258 O<sub>2</sub>·L<sup>-1</sup>

|             |       | Kinetic Parameters                 |                                    |            |                                              | $R^2$ |
|-------------|-------|------------------------------------|------------------------------------|------------|----------------------------------------------|-------|
|             |       | $A_{max}$<br>(mg·L <sup>-1</sup> ) | $A_{min}$<br>(mg·L <sup>-1</sup> ) | $l$<br>(h) | $p$<br>(g·L <sup>-1</sup> ·h <sup>-1</sup> ) |       |
| Lactic acid | Ac-10 | 3,484 ± 142                        | 2,678 ± 192                        | 329 ± 52   | 0.016 ± 0.030                                | 0,46  |
|             | Ac-20 | 6,846 ± 253                        | 2,268 ± 2,079                      | 135 ± 60   | 0.010 ± 0.008                                | 0,75  |

259  
260 As shown in Figure 3, cultures *C. acetobutylicum* and *C. beijerinckii* resulted in high lactic acid  
261 production. Table 4 highlights the production of volatile organic acids and the productivity of the  
262 most significant product, as well as solvent production and ethanol yield.

263

264 Table 4 – Initial concentrations of sucrose, final concentrations of volatile organic acids (acetic,  
 265 butyric, propionic and lactic), final solvent concentrations (ethanol and butanol), average  
 266 productivity ( $P_m$ ,  $\text{g}\cdot\text{L}^{-1}\cdot\text{h}^{-1}$ ) and ethanol yield ( $Y_{\text{EtOH}}$ ).

| Condition                                | Sucrose<br>(1st analysis)<br>( $\text{mg L}^{-1}$ ) | Final concentration of acids ( $\text{mg L}^{-1}$ ) |                 |                   |                | Concentration of<br>solvents ( $\text{mg L}^{-1}$ ) |         | $P_m$<br>( $\text{g}\cdot\text{L}^{-1}\cdot\text{h}^{-1}$ ) |                             |
|------------------------------------------|-----------------------------------------------------|-----------------------------------------------------|-----------------|-------------------|----------------|-----------------------------------------------------|---------|-------------------------------------------------------------|-----------------------------|
|                                          |                                                     | Acetic<br>acid                                      | Butyric<br>acid | Propionic<br>acid | Lactic<br>acid | Ethanol                                             | Butanol |                                                             |                             |
| 10,000 $\text{mg O}_2\cdot\text{L}^{-1}$ | <i>C. Aceto.</i>                                    | 1,663 (24h)                                         | 535.8           | 160.5             | 168.0          | 3,331                                               | 262.5   | 0                                                           | Lactic:<br>$0.02 \pm 0.030$ |
|                                          | <i>C. Beij.</i>                                     | 3,021 (2h)                                          | 759.0           | 244.3             | 351.2          | 5,709                                               | 464.5   | 1.9                                                         | Acetic:<br>$0.03 \pm 0.106$ |
| 20,000 $\text{mg O}_2\cdot\text{L}^{-1}$ | <i>C. Aceto.</i>                                    | 7,023 (23h)                                         | 1,148           | 345.1             | 343.1          | 6,417                                               | 536.7   | 0                                                           | Lactic:<br>$0.01 \pm 0.008$ |
|                                          | <i>C. Beij.</i>                                     | 6,830 (3h)                                          | 701.9           | 462.0             | 314.4          | 7,136                                               | 848.8   | 3.8                                                         | -                           |

267  
 268 As shown in Table 4, concentrations of COD of 10,000  $\text{mg O}_2\cdot\text{L}^{-1}$  produced optimum lactic acid  
 269 of 3,331  $\text{mg}\cdot\text{L}^{-1}$  and 5,709  $\text{mg}\cdot\text{L}^{-1}$  with respectively *C. acetobutylicum* and *C. beijerinckii*.  
 270 Moreover, concentrations of COD of 20,000  $\text{mg O}_2\cdot\text{L}^{-1}$  produced optimum lactic acid of 6,417  
 271  $\text{mg}\cdot\text{L}^{-1}$  and 7.136  $\text{mg}\cdot\text{L}^{-1}$  with respectively *C. acetobutylicum* and *C. beijerinckii*.  
 272 The complex substrate used allow to infer that both strains can adapt to the usage of vinasse as  
 273 substrate to produce lactic acid. This use is presented as an alternative method of environmental  
 274 waste management.

275  
 276 **4 CONCLUSION**  
 277 The study presented that both strains, *C. acetobutylicum* and *C. beijerinckii*, were able to produce  
 278 lactic acid from a complex substrate without additional of vitamins, buffer solution and  
 279 micronutrients. The production of lactic acid was favored presenting a final concentration of



280 7.136 g L<sup>-1</sup>, in the condition of 20,000 mg l<sup>-1</sup> of COD. The results presented were highly  
281 influenced by pH and the acidogenic route was preponderant over the solventogenic route,  
282 despite the different inoculums and F/M-ratio studied.

283

## 284 **5 ACKNOWLEDGMENTS**

285 The authors thank *Coordenação de Aperfeiçoamento de Pessoal de Nível Superior (CAPES)* for  
286 supporting this master study. Moreover, authors appreciate the collaboration of *Centro de*  
287 *Monitoramento e Pesquisa da Qualidade em Combustíveis, Biocombustíveis, Petróleo e*  
288 *Derivados (CEMPEQC)* for gas chromatography (CG) analysis focusing on butanol production.

289

## 290 **6 REFERENCES**

- 291 [1] C. H. Brito Cruz, G. M. Souza, H. Cantarella, M.-A. van Sluys, and R. Maciel Filho,  
292 *Universidades e empresas: 40 anos de ciência e tecnologia para o etanol brasileiro*. 2015.
- 293 [2] CONAB, “Perfil do Setor do Açúcar e do Etanol no Brasil - safra 2014/2015,” p. 64,  
294 2017.
- 295 [3] R. Centro-sul, “Relatório final da safra 2016/2017 Região Centro-Sul,” 2017.
- 296 [4] S. C. Rabelo, H. Carrere, R. Maciel Filho, and a C. Costa, “Production of bioethanol,  
297 methane and heat from sugarcane bagasse in a biorefinery concept.,” *Bioresour. Technol.*,  
298 vol. 102, no. 17, pp. 7887–95, Sep. 2011.
- 299 [5] BNDES & CGEE, *Sugarcane-based bioethanol: energy for sustainable develop- ment*.  
300 Rio de Janeiro, 2008.
- 301 [6] L. T. Fuess and M. L. Garcia, “Anaerobic digestion of stillage to produce bioenergy in the  
302 sugarcane-to-ethanol industry,” *Environ. Technol. (United Kingdom)*, vol. 35, no. 3, pp.

- 303 333–339, 2014.
- 304 [7] C. A. Christofolletti, J. P. Escher, J. E. Correia, J. F. U. Marinho, and C. S. Fontanetti,  
305 “Sugarcane vinasse: Environmental implications of its use,” *Waste Manag.*, vol. 33, no.  
306 12, pp. 2752–2761, Dec. 2013.
- 307 [8] L. A. G. de Godoi, E. Foresti, and M. H. R. Z. Damianovic, “Down-flow fixed-structured  
308 bed reactor: An innovative reactor configuration applied to acid mine drainage treatment  
309 and metal recovery,” *J. Environ. Manage.*, vol. 197, pp. 597–604, 2017.
- 310 [9] T. Lutke-Eversloh and H. Bahl, “Metabolic engineering of *Clostridium acetobutylicum*:  
311 Recent advances to improve butanol production,” *Current Opinion in Biotechnology*. pp.  
312 634–647, 2011.
- 313 [10] M. Kumar and K. Gayen, “Developments in biobutanol production: New insights,”  
314 *Applied Energy*. 2011.
- 315 [11] D. T. Jones and D. R. Woods, “Acetone-butanol fermentation revisited.,” *Microbiol. Rev.*,  
316 vol. 50, no. 4, pp. 484–524, 1986.
- 317 [12] J. B. Ewaschuk, J. M. Naylor, and G. A. Zello, “Critical Review D -Lactate in Human and  
318 Ruminant Metabolism,” no. April, pp. 1619–1625, 2005.
- 319 [13] M. Özkan, E. I. Yılmaz, L. R. Lynd, and G. Özcengiz, “Cloning and expression of the  
320 *Clostridium thermocellum* L-lactate dehydrogenase gene in *Escherichia coli* and enzyme  
321 characterization,” *Can. J. Microbiol.*, vol. 50, no. 10, pp. 845–851, 2004.
- 322 [14] R. RedCorn and A. S. Engelberth, “Identifying conditions to optimize lactic acid  
323 production from food waste co-digested with primary sludge,” *Biochem. Eng. J.*, vol. 105,  
324 pp. 205–213, Jan. 2016.
- 325 [15] M. A. Abdel-Rahman and K. Sonomoto, “Opportunities to overcome the current

- 326 limitations and challenges for efficient microbial production of optically pure lactic acid,”  
327 *Journal of Biotechnology*, vol. 236. Elsevier B.V., pp. 176–192, 20-Oct-2016.
- 328 [16] APHA, *Standard Methods for the Examination of Water and Wastewater*, vol. 21 Ed.  
329 Washington, DC., 2005.
- 330 [17] M. Dubois, K. A. Gilles, J. K. Hamilton, P. A. Rebers, and F. Smith, “Colorimetric  
331 Method for Determination of Sugars and Related Substances.”
- 332 [18] S. D. M. Lucas, G. Peixoto, G. Mockaitis, M. Zaiat, and S. D. Gomes, “Energy recovery  
333 from agro-industrial wastewaters through biohydrogen production: Kinetic evaluation and  
334 technological feasibility,” *Renew. Energy*, vol. 75, pp. 496–504, 2015.
- 335 [19] E. A. Buehler and A. Mesbah, “Kinetic study of acetone-butanol-ethanol fermentation in  
336 continuous culture,” *PLoS One*, vol. 11, no. 8, Aug. 2016.
- 337 [20] Y. Zhu and S. T. Yang, “Effect of pH on metabolic pathway shift in fermentation of  
338 xylose by *Clostridium tyrobutyricum*,” *J. Biotechnol.*, vol. 110, no. 2, pp. 143–157, May  
339 2004.
- 340
